# Supplementary material for: Estimating snow accumulation and ablation with L-band InSAR
Source: Copernicus journal article supplement (doi:10.5194/tc-2022-224), 2022-11-16

2020-02-06 Sentinel-2 L1C RGB=Band (8,4,3).jpg

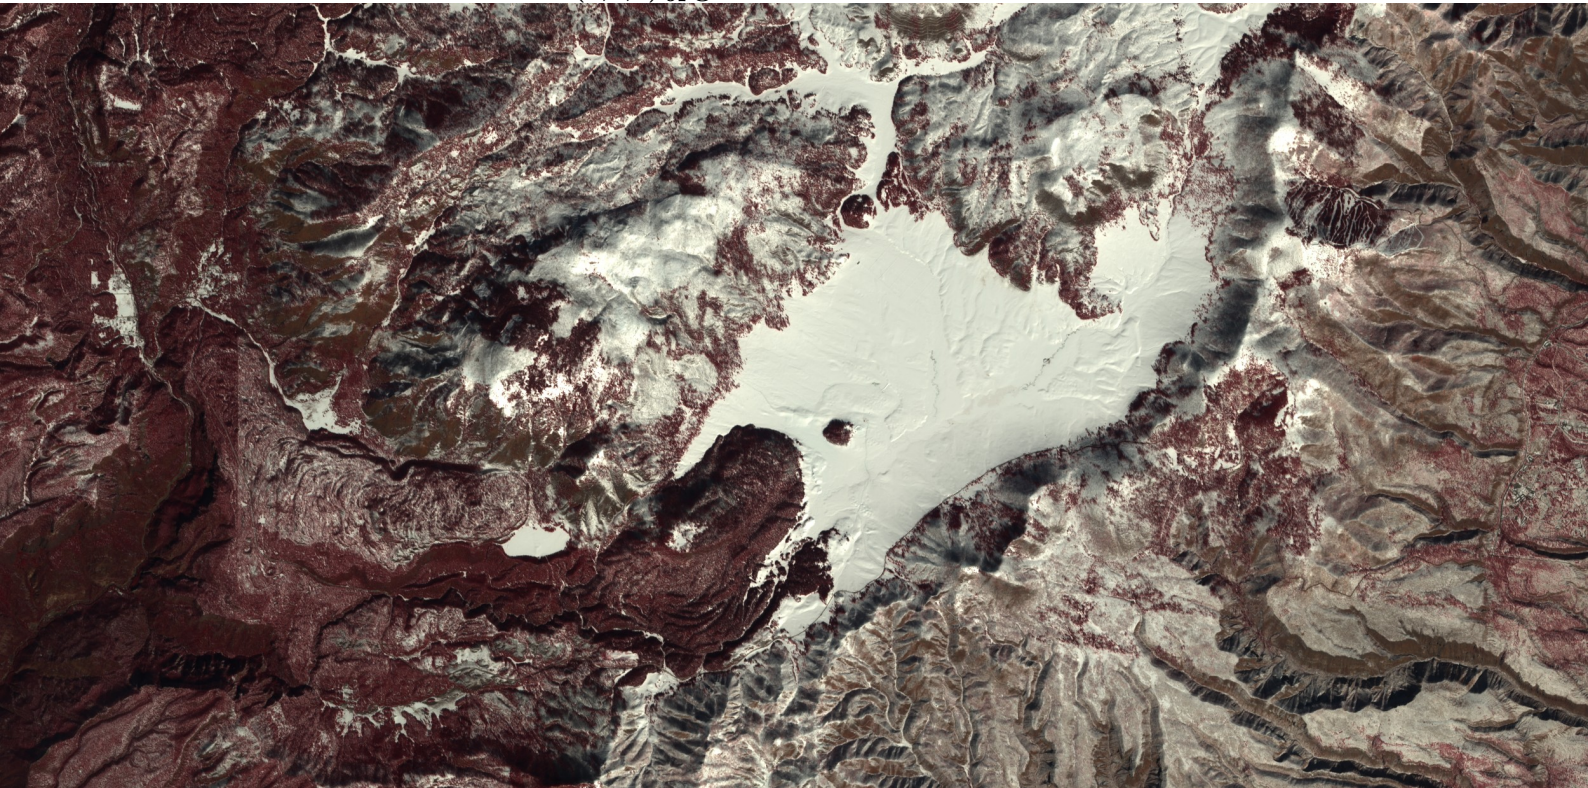

2020-02-16 Sentinel-2 L1C RGB=Band (8,4,3).jpg

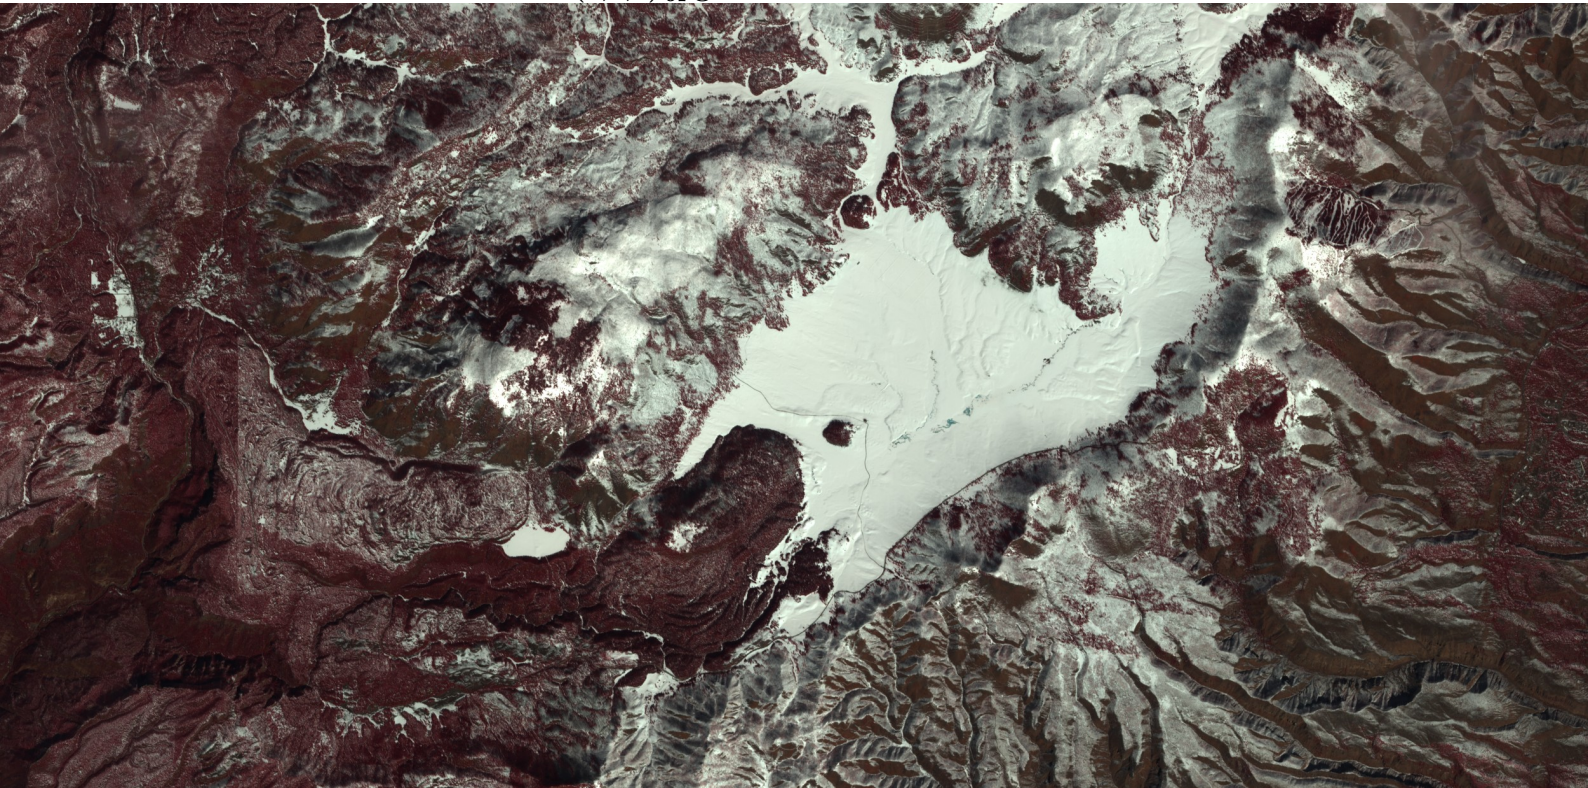

2020-02-26 Sentinel-2 L1C RGB=Band (8,4,3).jpg

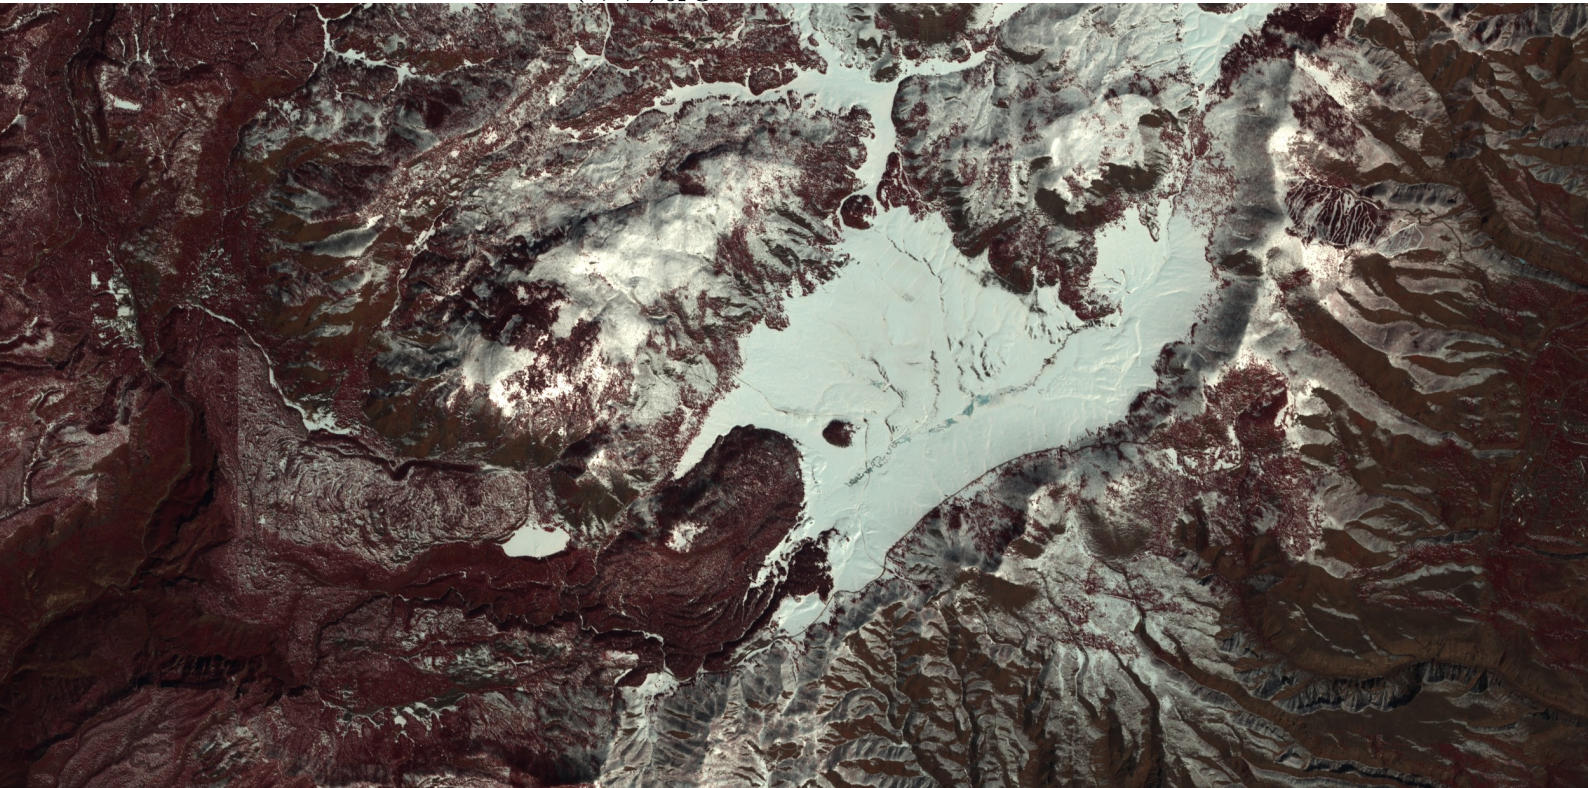

Supplement: Supplementary file [file tc-2022-224-RC2-supplement.pdf]
